# Supplementary material for: Controllable and robust dual-emissive quantum dot nanohybrids as inner filter-based ratiometric probes for visualizable melamine detection
Source: Royal Society of Chemistry journal article supplement (doi:10.1039/c9nr08849k), 2020-01-01
Supplement: c9nr08849k1.pdf [file c9nr08849k1.pdf]

## Supporting Information

### Controllable and Robust Dual-Emissive Quantum Dot Nanohybrids as Inner Filter-based Ratiometric Probes for Visualizable Melamine Detection

Jing Wang, Xinyue Liu, Liang Huang, Jiening Jin, Chenxing Jiang, Daquan Li, Huimin Wen, and Jun  
Hu\*

College of Chemical Engineering, Zhejiang University of Technology. Hangzhou 310014, PR China.

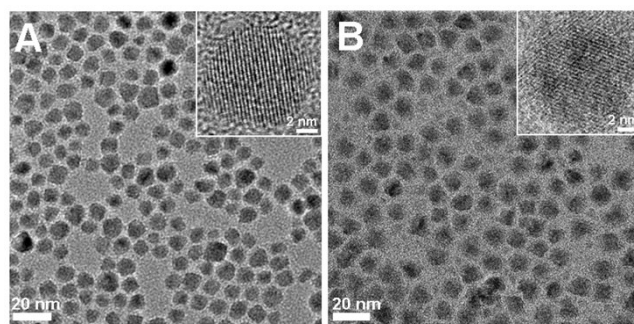

**Fig. S1.** TEM images of G-QDs (A) and R-QDs (B). Inset is an enlarged image of a single QD.

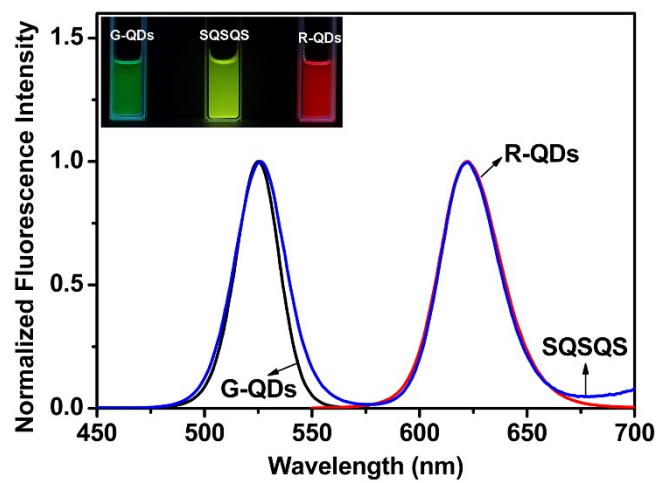

**Fig. S2.** Fluorescence emission spectra of G-QDs, R-QDs, and SQSQS. Inset images are the corresponding fluorescence photos under a 365 nm UV lamp.

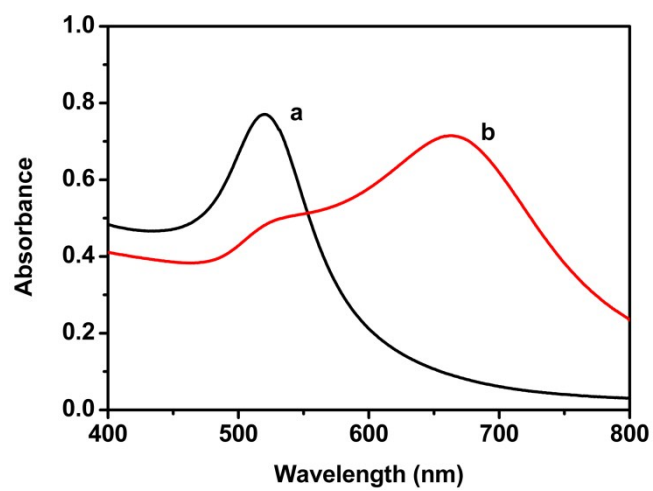

**Fig. S3.** UV-vis spectra of AuNPs (a) before and (b) after adding 0.96  $\mu\text{M}$  melamine.

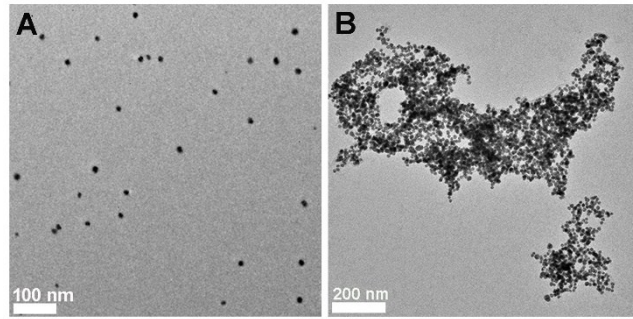

**Fig. S4.** TEM images of AuNPs (A) before and (B) after adding 0.96  $\mu\text{M}$  melamine.

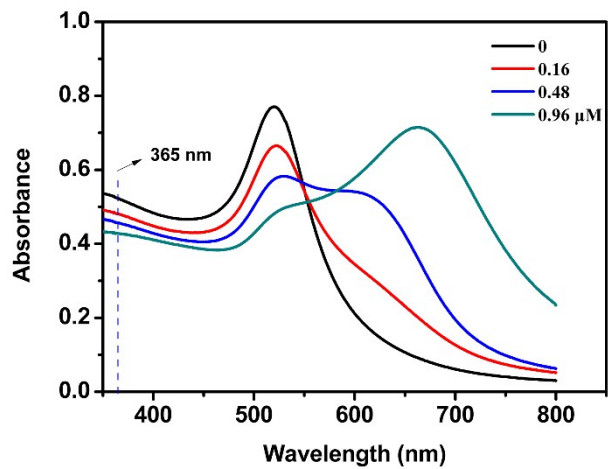

Fig. S5. UV-vis absorption spectra of AuNPs with different concentrations of melamine.

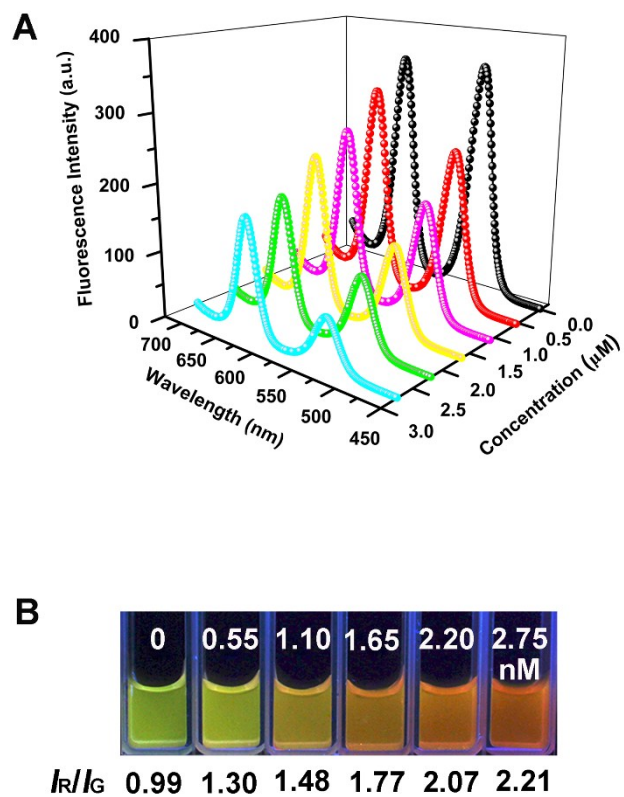

**Fig. S6.** (A) Fluorescence spectra of SQSQS ( $45 \mu\text{g mL}^{-1}$ ) in the presence of various concentrations of AuNPs. The concentrations of AuNPs are 0, 0.55, 1.10, 1.65, 2.20, and 2.75 nM. (B) The corresponding fluorescence photos under a 365 nm UV lamp and fluorescence intensity ratio ( $I_{627}/I_{528}$ ) of SQSQS.

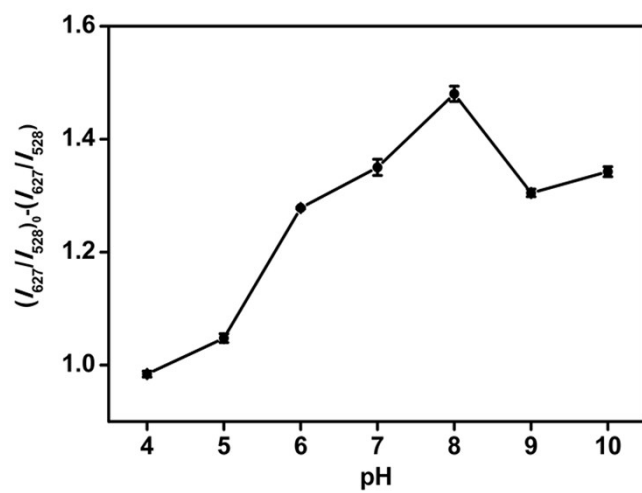

**Fig. S7.** Effects of pH on the fluorescence ratio  $I_{627}/I_{528}$  ( $n = 3$ ).  $(I_{627}/I_{528})_0$  and  $(I_{627}/I_{528})$  are the intensity ratio before and after adding 0.8  $\mu\text{M}$  melamine, respectively.



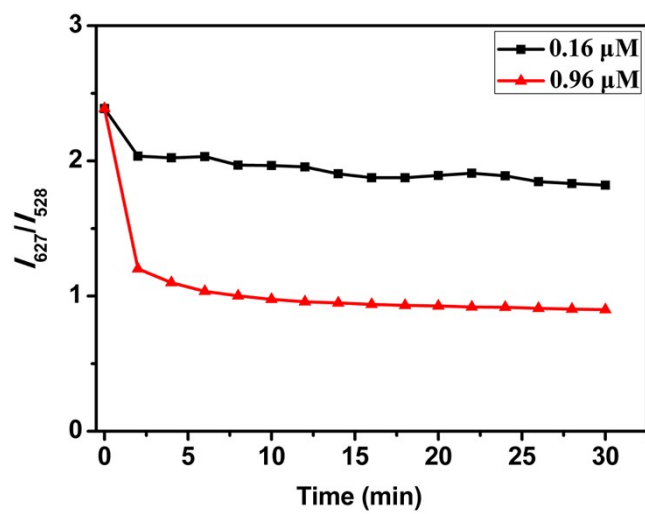

Fig. S8. Effects of reaction time on the fluorescence ratio  $I_{627}/I_{528}$  ( $n = 3$ ), the data were taken at the interval of 2 min.

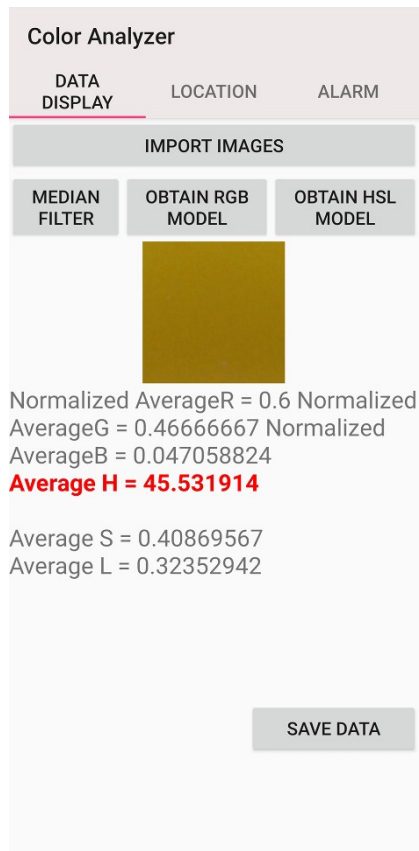

Fig. S9. "Color Analyzer" app for analyzing the hue value.

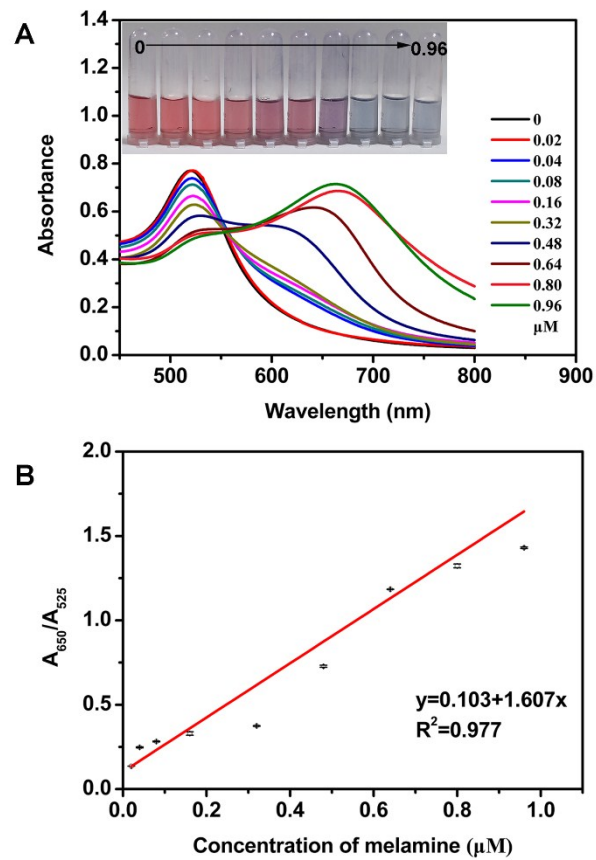

**Fig. S10.** (A) UV-vis absorption spectra of AuNPs with different concentrations of melamine. The inset are corresponding photographs. (B) The corresponding plot of  $A_{650}/A_{525}$  versus melamine concentration. The spectral and visual detection limits are 15.7 and 80 nM, respectively.

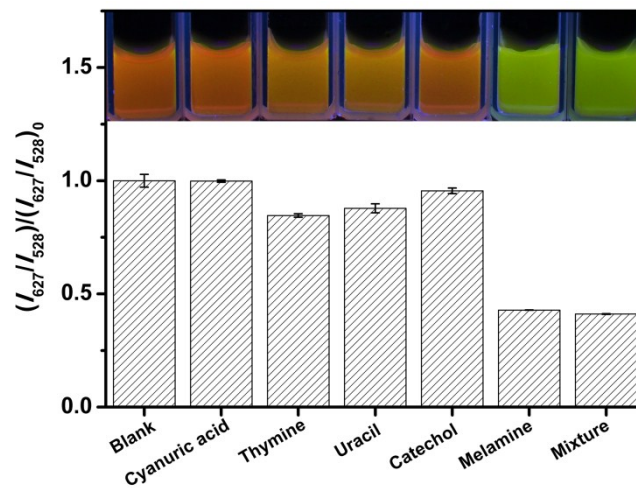

**Fig. S11.** Fluorescence response of the optimized probe in the presence of cyanuric acid, thymine, uracil, catechol and melamine (from left to right), the concentration of melamine was 1  $\mu\text{M}$ , other molecules were 2  $\mu\text{M}$ .

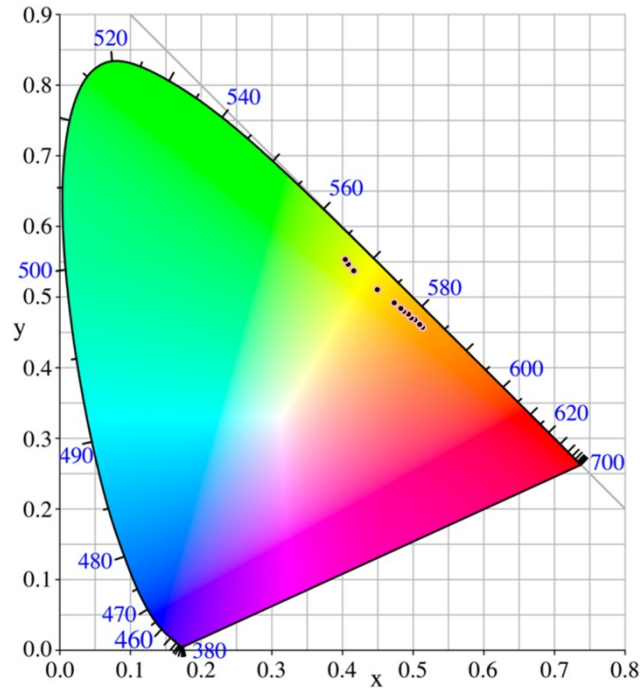

**Fig. S12.** Use the emission spectrum data to calculate a standard color for each concentration by performing a CIE calculation.

**Table S1.** The comparison of melamine detection by colorimetric and ratiometric fluorescence probes.

| Methods                  | System                              | Spectral Detection        |                     | Visual Detection  |                     | References |
|--------------------------|-------------------------------------|---------------------------|---------------------|-------------------|---------------------|------------|
|                          |                                     | Linear range              | LOD                 | Linear range      | LOD                 |            |
|                          |                                     | ( $\mu\text{M}$ )         | (nM)                | ( $\mu\text{M}$ ) | (nM)                |            |
| Colorimetric             | MTT-stabilized AuNPs                | 0.004 – 0.2, 0.28 – 0.440 | 0.2                 | -                 | 20                  | 45         |
| Colorimetric             | Peroxidase-AuNPs                    | 0.001 – 0.8               | 0.2                 | -                 | 500                 | 46         |
| Colorimetric             | NaHSO <sub>4</sub> -optimized AuNPs | -                         | -                   | -                 | 200                 | 47         |
| Colorimetric             | NT-AuNPs                            | 0.20 - 0.45               | 3.5                 | -                 | 3.0×10 <sup>3</sup> | 48         |
| Colorimetric             | Triton X-100-AuNPs                  | 0.75–1.75                 | 5.1                 | -                 | 1.0×10 <sup>3</sup> | 49         |
| Colorimetric             | MA-AuNPs                            | 48 - 333                  | 3.2×10 <sup>4</sup> | -                 | 2.4×10 <sup>5</sup> | 50         |
| Colorimetric             | Aptamer- AuNPs                      | 8 - 238                   | 4.0×10 <sup>3</sup> | -                 | 1.2×10 <sup>4</sup> | 51         |
| Ratiometric Fluorescence | MIP@QDs                             | 0.1 - 0.8                 | 38                  | -                 | -                   | 52         |
| Ratiometric Fluorescence | Ply-BFSA OFNs@Au NCs                | -                         | 680                 | -                 | -                   | 53         |
| Ratiometric Fluorescence | CNDs/GSH@Au NCs                     | 0.1 - 30                  | 29.3                | -                 | -                   | 54         |
| Ratiometric Fluorescence | MIP-g/r-QDs                         | 0.4 - 8                   | 100                 | -                 | -                   | 55         |
| Ratiometric Fluorescence | SQSQS@ AuNPs                        | 0.02 - 0.96               | 7                   | 0.02-0.96         | 18                  | This work  |

**Table S2.** The spiking/recovery experiments results of melamine detection by HPLC.

| Detection Method | Added ( $\mu\text{M}$ ) | Found (Average $\mu\text{M}$ ) | Recovery (%) | RSD (%) |     |
|------------------|-------------------------|--------------------------------|--------------|---------|-----|
| HPLC             | 0                       | Not Detected                   | -            | 1.9     |     |
|                  | pure                    | 0.20                           | 0.174        | 87.2    | 8.0 |
|                  | milk                    | 0.50                           | 0.432        | 86.4    | 2.8 |
|                  |                         | 0.80                           | 0.696        | 87.0    | 1.1 |
|                  | <hr/>                   |                                |              |         |     |
|                  |                         | 0                              | Not Detected | -       | 2.2 |
|                  | milk                    | 0.20                           | 0.216        | 108     | 4.6 |
|                  | powder                  | 0.50                           | 0.448        | 89.6    | 2.7 |
|                  |                         | 0.80                           | 0.680        | 85.0    | 1.8 |

Data are expressed as mean  $\pm$  standard deviation (n = 3).
